# Supplementary material for: A Plant Biostimulant from Ascophyllum nodosum Potentiates Plant Growth Promotion and Stress Protection Activity of Pseudomonas protegens CHA0
Source: MDPI journal article supplement (doi:10.3390/plants12061208), 2023-03-07
Supplement: s1 [file s1]

**Table S1.** Media used for growing the different bacterial cultures.

| No. | Bacterial Species                                 | Growth media                                |
|-----|---------------------------------------------------|---------------------------------------------|
| 1   | <i>Azospirillum lipoferum</i> 1842                | Nutrient agar (NA)                          |
| 2   | <i>Azotobacter vinelandii</i> (ATCC12837)         | Potato dextrose agar (PDA)                  |
| 3   | <i>Bacillus subtilis</i>                          | Yeast extract mannitol (YEM) agar           |
| 4   | <i>Bacillus thuringiensis</i> subsp. <i>oloke</i> | Mannitol egg yolk polymyxin (MEYP) agar     |
| 5   | <i>Bradyrhizobium japonicum</i> 3I1b6             | Nutrient agar (NA)                          |
| 6   | <i>Enterobacter agglomerans</i> (ATCC23216)       | Nutrient agar (NA)                          |
| 7   | <i>Enterobacter cloacae</i> CAL2                  | Nutrient agar (NA)                          |
| 8   | <i>Kluyvera ascorbata</i> SUD165                  | MRS (deMan, Rogosa, and Sharpe) agar        |
| 9   | <i>Lactobacillus acidophilus</i> (ATCC 4356)      | Yeast mannitol agar (YMA)                   |
| 10  | <i>Paenibacillus polymyxa</i> K56                 | Tryptic soy agar (TSA)                      |
| 11  | <i>Pseudomonas brassicacearum</i> ZY-2-1          | Tryptic soy agar (TSA)                      |
| 12  | <i>Pseudomonas fluorescens</i> 34-13              | Luria-Bertani (LB) agar                     |
| 13  | <i>Pseudomonas protegens</i> CHAO                 | Tryptic soy agar (TSA)                      |
| 14  | <i>Pseudomonas putida</i> (ATCC 12633)            | Yeast mannitol agar (YMA)                   |
| 15  | <i>Sinorhizobium fredii</i> (ATCC51808)           | Luria-Bertani (LB) agar                     |
| 16  | <i>Sinorhizobium meliloti</i> RM11559             | Mitis Salivarius Agar with Tellurite (MSAT) |
| 17  | <i>Streptococcus salivarius</i> C699              | Nutrient agar (NA)                          |

**Table S2.** List of primers used in the qPCR experiment.

| Name of the gene*; gene ID | Forward primers              | Reverse primers               |
|----------------------------|------------------------------|-------------------------------|
| <i>hcnA</i> ; 57475633     | 5'- CCGTCCTCAGCGTGATCC-3'    | 5'- CGGCTTGACCAGGGTCTG-3'     |
| <i>WspR</i> ; 57474139     | 5'- GCCAACGACTACCTGGTCAAG-3' | 5'- GTCGGAGTTCATCAGCCGTTG -3' |
| <i>cheW</i> ; 57474134     | 5'- AAGCAAGTGGTCGGGATCAT -3' | 5'- GTTCCGACCATTCTCTTCG -3'   |
| <i>pvdS</i> ; 57477257     | 5'- AGACGTGGTTCAAGATGCGT -3' | 5'- TCAGGTGAAGCGCCATGAAT -3'  |
| <i>rpoC</i> ; 57478537     | 5'- ACCCAGGGCGAGAAGTACAA- 3' | 5'- CCCGAGTCAGCCATCATGTA- 3'  |

\**hcnA*, cyanide-forming glycine dehydrogenase subunit HcnA; *WspR*, signal transduction system regulator diguanylate cyclase; *cheW*, chemotaxis protein; *pvdS* RNA polymerase sigma-70 factor, ECF subfamily; *rpoC*, DNA-directed RNA polymerase subunit beta.
